# Supplementary material for: Relieving the fermentation inhibition enables high electron recovery from landfill leachate in a microbial electrolysis cell
Source: Royal Society of Chemistry journal article supplement (doi:10.1039/c5ra25918e), 2016-01-01
Supplement: c5ra25918e1.pdf [file c5ra25918e1.pdf]

## Supplemental Information

### **Relieving the fermentation inhibition enables high electron recovery from landfill leachate in a microbial electrolysis cell**

Mohamed Mahmoud<sup>§</sup>, Prathap Parameswaran <sup>§ †</sup>, César I. Torres <sup>§</sup>, and Bruce E. Rittmann <sup>§</sup>

<sup>§</sup> Swette Center for Environmental Biotechnology, The Biodesign Institute at Arizona State University, P.O. Box 875701, Tempe, AZ 85287–5701, USA

<sup>†</sup> Department of Civil Engineering, Kansas State University, 2118 Fiedler Hall, Manhattan, KS 66506

Number of Figures: 2

Number of Tables: 1

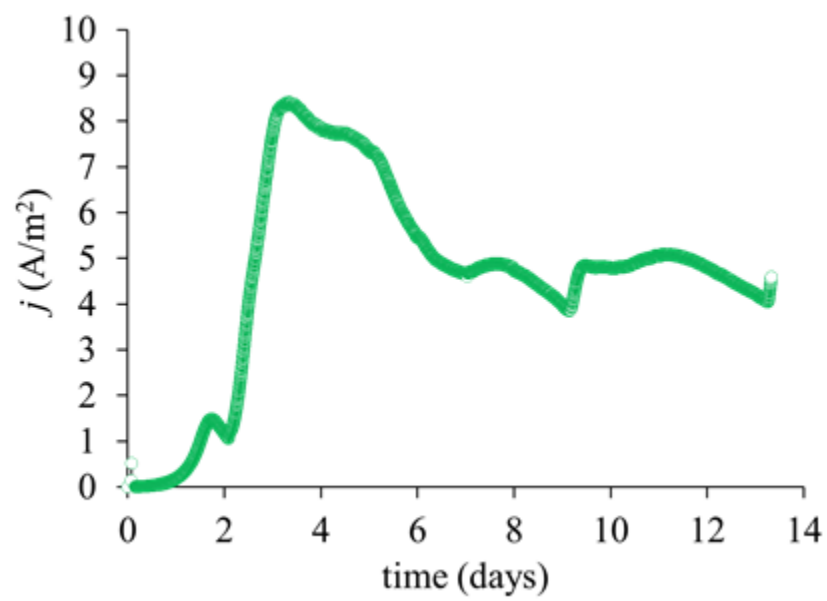

Figure S1. Current density during the initial period of biofilm formation on the anode.

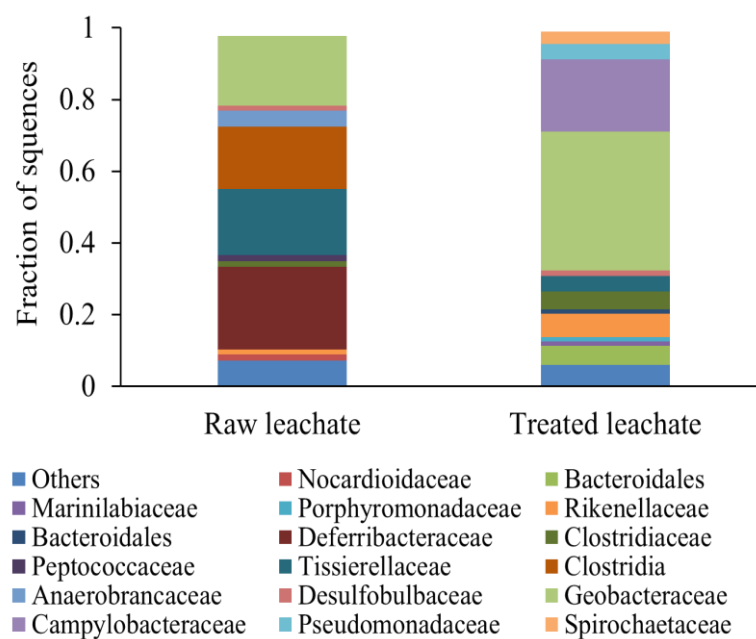

Figure S2. Microbial community distribution for biofilms at the family level.

Table S1. Summary of the Fenton oxidation process

---

|             |                                                             |
|-------------|-------------------------------------------------------------|
| Reaction 1: | $Fe^{2+} + H_2O_2 \rightarrow Fe^{3+} + OH^- + OH^\bullet$  |
| Reaction 2: | $Fe^{3+} + H_2O_2 \rightarrow Fe^{2+} + HO_2^\bullet + H^+$ |
| Reaction 3: | $H_2O_2 + OH^\bullet \rightarrow HO_2^\bullet + H_2O$       |
| Reaction 4: | $Fe^{2+} + OH^\bullet \rightarrow Fe^{3+} + OH^-$           |
| Reaction 5: | $Fe^{3+} + HO_2^\bullet \rightarrow Fe^{2+} + HO_2^+$       |
| Reaction 6: | $Fe^{2+} + HO_2^\bullet + H^+ \rightarrow Fe^{3+} + H_2O_2$ |
| Reaction 7: | $HO_2^\bullet + HO_2^\bullet \rightarrow H_2O_2 + O_2$      |

---

Adapted from Duesterberg and Waite (2006) and Deng and Englehardt (2006)

## References

- Deng, Y. and Englehardt, J.D., 2006. Treatment of landfill leachate by the Fenton process. *Water Res.* 40, 3683 – 3694.
- Duesterberg, C.K., and Waite, T.D., 2006. Process optimization of Fenton oxidation using kinetic modeling. *Environ. Sci. Technol.* 40, 4189–4195.
